CORRECTION

# Correction: IBR5 Modulates Temperature-Dependent, R Protein CHS3-Mediated Defense Responses in *Arabidopsis*

The PLOS Genetics Staff

The affiliation for the seventh author is incorrect. Shuhua Yang is not affiliated with #2, but with #1 State Key Laboratory of Plant Physiology and Biochemistry, College of Biological Sciences, National Plant Gene Research Center, China Agricultural University, Beijing, China. The publisher apologizes for the error.

## Reference

1. Liu J, Yang H, Bao F, Ao K, Zhang X, Zhang Y, et al. (2015) IBR5 Modulates Temperature-Dependent, R Protein CHS3-Mediated Defense Responses in *Arabidopsis*. PLoS Genet 11(10): e1005584. doi: [10.1371/journal.pgen.1005584](https://doi.org/10.1371/journal.pgen.1005584) PMID: [26451844](https://pubmed.ncbi.nlm.nih.gov/26451844/)

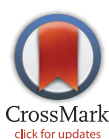

## OPEN ACCESS

**Citation:** The PLOS Genetics Staff (2016) Correction: IBR5 Modulates Temperature-Dependent, R Protein CHS3-Mediated Defense Responses in *Arabidopsis*. PLoS Genet 12(1): e1005795. doi:10.1371/journal.pgen.1005795

**Published:** January 6, 2016

**Copyright:** © 2016 The PLOS Genetics Staff. This is an open access article distributed under the terms of the [Creative Commons Attribution License](https://creativecommons.org/licenses/by/4.0/), which permits unrestricted use, distribution, and reproduction in any medium, provided the original author and source are credited.
